# Supplementary material
Source: Springer Nature journal article supplement (https://www.springermedizin.de/resource/supplementary/12871_2013_186_MOESM2_ESM.pdf/9429034)

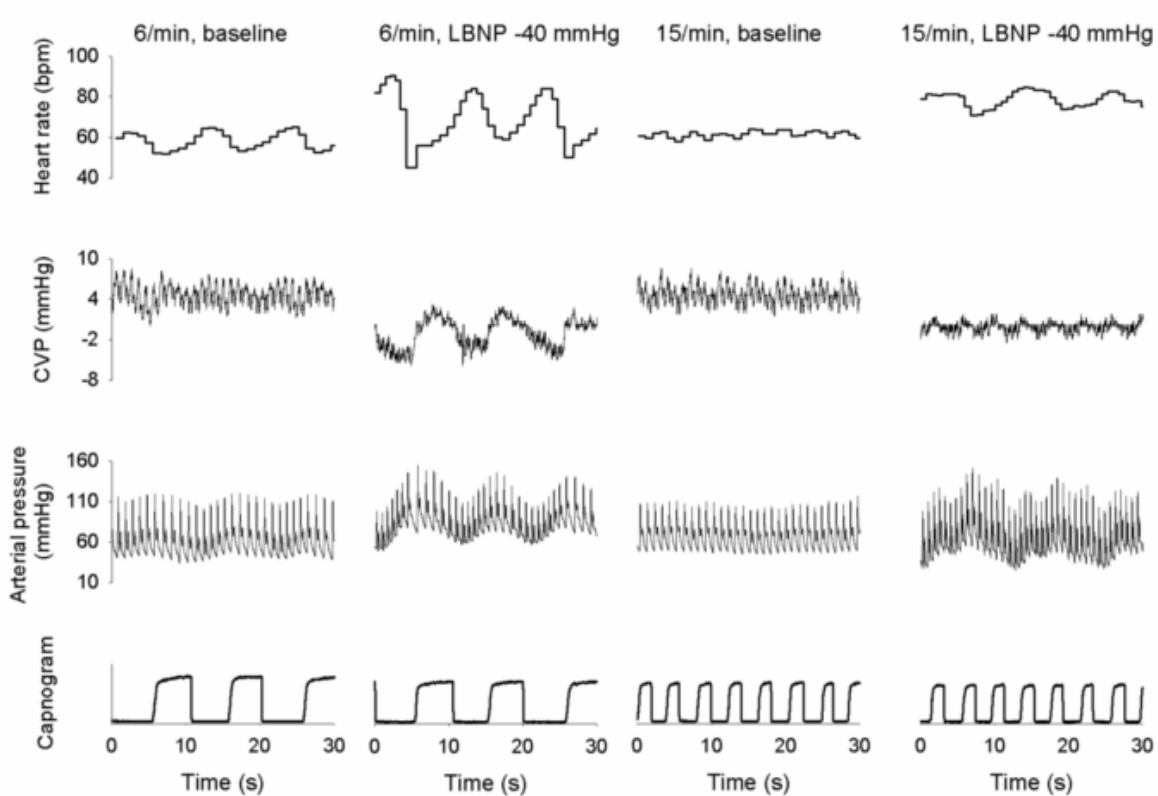

Supplement: MOESM2 [file 9429034]
